## Erratum

### **Engrailed and Fgf8 act synergistically to maintain the boundary between diencephalon and mesencephalon**

Scholpp, S., Lohs, C. and Brand, M. *Development* **130**, 4881-4893.

An error in this article was not corrected before going to press.

Throughout the paper, *efna4* should be read as *EphA4*, as the authors are referring to the gene encoding the ephrin A4 receptor (EphA4) and not to that encoding its ligand ephrin A4.

We apologise to the authors and readers for this mistake.
